# Supplementary material for: Polymer Thin Film Promotes Tumor Spheroid Formation via JAK2-STAT3 Signaling Primed by Fibronectin-Integrin α5 and Sustained by LMO2-LDB1 Complex
Source: Biomedicines. 2022 Oct 24;10(11):2684. doi: 10.3390/biomedicines10112684 (PMC9687151; doi:10.3390/biomedicines10112684)
Supplement: Supplementary file 1 [file biomedicines-10-02684-s001.zip › biomedicines-1954646 Supplementary Table 1 (siRNA SEQ).xlsx]

## Sheet: Table S1
Table S1. The sequences of siRNAs.
siITGA5 #1	CUCCUAUAUGUGACCAGAG
siITGA5 #2	GUUUCACAGUGGAAUUCA
siLDB1 #1	CUUGUAAAGCCCCCCCUG
siLDB1 #2	CAAACUUGCCAGGGGAAG
siLMO2 #1	CCATAGTAACTGACATGATTA
siLMO2 #2	GCGGGTGAAAGACAAAGTGTA
siFN1 #1	AGAUUUGGUUUGGGAUCAAUA
siFN1 #2	CGUGGUUGUAUCAGGACUUAU
siJAK1 #1	UCGUCCACAACAUACAGAAU
siJAK1 #2	CUAUCAUGAGAACAUUGUGA
siJAK2 #1	CCCUGACCCUAAAUAAUACAU
siJAK2 #2	GCAGAAUUAGCAAACCUUAUA
	(5'→3')
