# Supplementary material for: Polymer Thin Film Promotes Tumor Spheroid Formation via JAK2-STAT3 Signaling Primed by Fibronectin-Integrin α5 and Sustained by LMO2-LDB1 Complex
Source: Biomedicines. 2022 Oct 24;10(11):2684. doi: 10.3390/biomedicines10112684 (PMC9687151; doi:10.3390/biomedicines10112684)
Supplement: Supplementary file 1 [file biomedicines-10-02684-s001.zip › biomedicines-1954646 Supplementary Table 2 (Primer lists).xlsx]

## Sheet: Table S2
Table S2. The list of primers for qRT-PCR amplification.
hOCT4	forward	GACAACAATGAGAACCTTCAG
	reverse	TTCTGGCGCCGGTTACAGAAC
hCD44	forward	AAGGTTGGAGCAAACACAACC
	reverse	CCACATTCTGCAGGTTCCTT
hNANOG	forward	ATAGCAATGGTGTGACGCAG
	reverse	GATTGTTCCAGGATTGGGTG
hNESTIN	forward	AACAGCGACGGAGGTCTCTA
	reverse	TTCTCTTGTCCCGCAGACTT
hALDH1A1	forward	GATGCCGACTTGGACAATGC
	reverse	TCTTAGCCCGCTCAACACTC
hCD117	forward	TGCTCTGCTTCTGTACTGCC
	reverse	GCCTTACATTCAACCGTGCC
hEpCAM	forward	CAAATGTGTGTGCGTGGGAC
	reverse	ACGATGGAGTCCAAGTTCTGG
hCD24	forward	GCCAGTCTCTTCGTGGTCTC
	reverse	CCTGTTTTTCCTTGCCACAT
hIL-6	forward	CCTGAACCTTCCAAAGATGGC
	reverse	TTCACCAGGCAAGTCTCCTCA
hEGR1	forward	CTTCAACCCTCAGGCGGACA
	reverse	GGAAAAGCGGCCAGTATAGGT
hPAK2	forward	ACAGAAGCACCCGCAGTAG
	reverse	AAAGACTTGGCAGCACCATC
hPTGS1	forward	GCCTCAACACCAAGACCTGT
	reverse	CCCAACACTCACCATGCCAA
h18S rRNA	forward	TGCATGGCCGTTCTTAGTTG
	reverse	AGTTAGCATGCCAGAGTCTCGTT
		(5'→3')
